# Supplementary material for: Single-crystal structure determination from microcrystalline powders (∼5 μm) by an orientation attachment mountable on an in-house X-ray diffractometer
Source: Royal Society of Chemistry journal article supplement (doi:10.1039/c5ce02307f), 2016-01-01
Supplement: c5ce02307f1.pdf [file c5ce02307f1.pdf]

## **Supplementary information**

### **Single-crystal structure determination from microcrystalline powders (~5 $\mu\text{m}$ ) by an orientation attachment mountable on an in-house X-ray diffractometer**

Chiaki Tsuboi, Kazuaki Aburaya, Fumiko Kimura, Masataka Maeyama, and Tsunehisa Kimura\*

#### **Materials and methods**

##### **Preparation of an L-alanine microcrystal suspension**

An as-received sample of L-alanine crystals (Wako Pure Chemical Industries, Ltd.) was pulverized using a mortar and pestle and passed consecutively through 125-, 75-, 45-, and 20-mesh sieves. Then, the powders remaining on the 20-mesh sieve (powder A) and the powders passed through (powder B) were collected. Powder A was dispersed in UV light-curable monomer (Kyoritsu Chemical XVL-14, viscosity  $12 \pm 2$  Pa s) to prepare 20 wt% microcrystal suspensions (suspension A). Powder B was also dispersed in the same monomer and allowed to stand for a few weeks to make larger microcrystals sink. Then, the upper part of the suspension was taken (suspension B). The sizes of microcrystals present in each of suspensions A and B determined by microscope were 20–45  $\mu\text{m}$  and  $<5$   $\mu\text{m}$ , respectively. In this study, the UV light-curable monomer was used only for a suspending medium because it formed a stable well-dispersed suspension of microcrystals; photopolymerization was not performed. Each suspension was poured into a glass capillary (2.5 mm $\phi$ ) and placed on a magnetic unit (a Kyoto University KU model  $\chi 10-3$ ) comprising a rotating unit and a pair of neodymium magnets ( $\sim 1$  T in the center). The capillary was rotated by a stepping motor controlled by a computer. The shutter was a metal disk with a diameter of 44 mm made of aluminum and copper plates with a thickness of 2 and 1 mm,

respectively, rotated by a stepping motor in synchronization with the rotation of the capillary. The shutter contained two slits with a width of  $\Delta\beta = 10^\circ$  separated by  $180^\circ$ .

### ***In situ* X-ray measurements of a MOMS**

The orientation attachment (magnetic unit and shutter) was mounted on a Rigaku R-AXIS RAPID diffractometer (collimator size = 0.8 mm  $\phi$ , graphite-monochromated Mo K $\alpha$  radiation, crystal-to-detector distance = 127.40 mm) where the goniometers for  $\chi$  and  $\phi$  angles were removed. The rotation speed  $\omega$  of the glass capillary was switched between  $\omega_s = 0.93$  rpm and  $\omega_q = 3.0$  rpm every  $90^\circ$ . The X-ray measurement began 3 h after the start of nonuniform sample rotation, when 3D alignment of the microcrystals was achieved.

Data were collected at room temperature to a maximum  $2\theta$  value of  $54.8^\circ$ . The angle  $\alpha$  was altered from  $0^\circ$  to  $200^\circ$  and  $340^\circ$  to  $360^\circ$  for suspension A, and from  $0^\circ$  to  $90^\circ$  and  $230^\circ$  to  $360^\circ$  for suspension B in increments of  $10^\circ$  by changing the starting position of the slits in the shutter before each measurement, respectively. The measurement time for suspension A was 3000 s for the ranges between  $0-90^\circ$  and  $180-200^\circ$  and 930 s for  $90-180^\circ$  and  $340^\circ$  to  $360^\circ$  to ensure that the net X-ray irradiated time per unit degree was 8.3 s for every measurement. The measurement time for suspension B was 8000 s for the ranges between  $0-90^\circ$  and  $230-270^\circ$  and 2480 s for  $270-360^\circ$  to ensure that the net X-ray irradiated time per unit degree was 22.2 s for every measurement. Each measurement time was calculated on the basis of the rotation speeds  $\omega_s$  and  $\omega_q$  used. In both measurements, a total of 22 diffraction images were recorded corresponding to the number of different starting positions of the slits. A measurement without the shutter was also performed for suspension A.

### **Single-crystal analyses**

Data were processed using RAPID AUTO software and the diffraction spots were indexed. The crystal structure was solved by direct methods<sup>[1]</sup> and then expanded using Fourier techniques and refined. All calculations were performed using the CrystalStructure<sup>[2]</sup> crystallographic software package except for refinement, which was performed using SHELXL-2013.<sup>[3]</sup> The calculation was performed without prior knowledge of the L-alanine crystal. The diffraction spots located beyond  $2\theta = 50.9^\circ$  were not used because this area was shadowed by the magnetic unit.

## References

- S1. M. C. Burla, R. Caliendo, M. Camalli, B. Carrozzini, G. L. Cascarano, C. Giacovazzo, M. Mallamo, A. Mazzone, G. Polidori and R. Spagna, *J. Appl. Crystallogr.*, 2012, **45**, 357.
- S2. CrystalStructure 4.0: Crystal Structure Analysis Package, Rigaku Corporation, Inc.: Tokyo, Japan, 2000.
- S3. Sheldrick, G. M. *Acta Crystallogr. C*. 2015, **71**, 3.
